# Supplementary material for: Synthesis of shape-controlled NiO–graphene nanocomposites with enhanced supercapacitive properties
Source: Royal Society of Chemistry journal article supplement (doi:10.1039/c5nj00040h), 2015-01-01
Supplement: c5nj00040h1.pdf [file c5nj00040h1.pdf]

Synthesis of Shape-Controlled NiO/Graphene Nanocomposites with Enhanced  
Supercapacitive Properties

Xiaomiao Feng,<sup>\*1</sup> Jinhua Zhou,<sup>1</sup> Linlin Wang,<sup>1</sup> Yi Li,<sup>1</sup> Zhendong Huang,<sup>1</sup> Shufen  
Chen,<sup>1</sup> Yanwen Ma,<sup>\*1</sup> Lianhui Wang,<sup>1</sup> and Xiaohong Yan<sup>2</sup>

<sup>1</sup> Key Laboratory for Organic Electronics and Information Displays & Institute of  
Advanced Materials, National Jiangsu Synergetic Innovation Center for Advanced  
Materials (SICAM);

<sup>2</sup> College of Electronic Science and Engineering,  
Nanjing University of Posts & Telecommunications, 9 Wenyuan Road, Nanjing  
210023, China

\* Corresponding authors.

E-mail addresses: iamxmfeng@njupt.edu.cn, iamywma@njupt.edu.cn

**1. Different magnification SEM images of GN-f.**

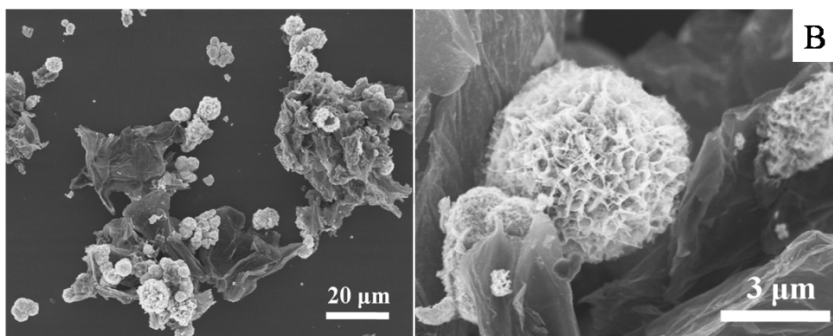

Fig.S1 SEM images of GN-f with different magnification.

**2. TEM images of flowerlike and polyhedral NiO/graphene nanocomposites**

TEM was employed for the crystal structure investigation. Fig. S2a showed a typical micrograph with a diameter about 3 μm, consistent with the morphology observed in SEM image. It was detected the NiO flower anchored on crumbled graphene. In the fig. S2b, a lot of polyhedral NiO were distributed on graphene sheets with average 50 nm in size.

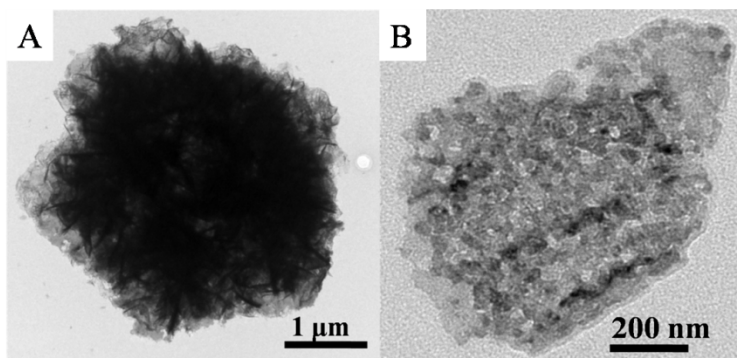

Fig.S2 TEM images of GN-f (A) and GN-P (B)

### 3. XPS, XRD pattern, and FT-IR of rGO.

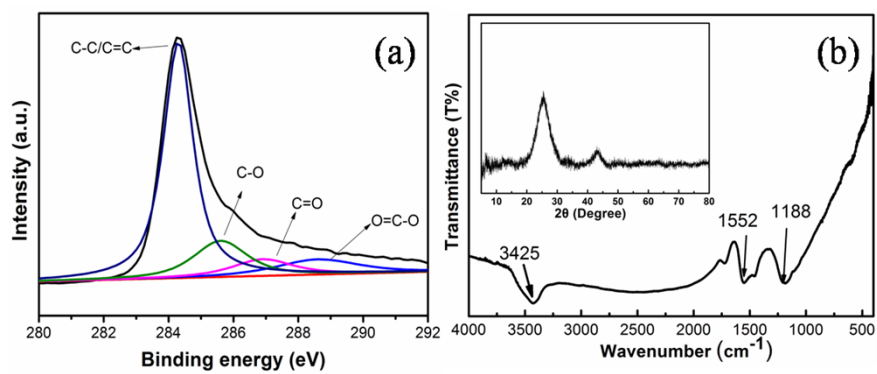

Fig.S3 XPS spectrum (a) and FT-IR spectrum (b) (inset the XRD pattern) of rGO
